# Supplementary material for: Molecular Clock of Neutral Mutations in a Fitness-Increasing Evolutionary Process
Source: PLoS Genet. 2015 Jul 15;11(7):e1005392. doi: 10.1371/journal.pgen.1005392 (PMC4503671; doi:10.1371/journal.pgen.1005392)
Supplement: S2 Table — The frequencies of each genomic mutation measured at the indicated generations from the middle of the previous adaptive evolution (Kishimoto et al 2010) to the ends of the following Line1 and Line2. The temperature at each generation was listed. The cluster No, JWID and gene name of each genomic mutation are indicated with description on synonymous or non-synonymous mutation in the column (S / N). (XLS) [file pgen.1005392.s003.xls]

## Sheet: Sheet1
				previous adaptive evolution											Line1						Line2
temparature (°C)				44.8											44.8	45.2	45.6	45.8	46	46	44.8	45.2	45.6	45.8	46
generation				5211.93	5357.88	5504.22	5802.23	6127.48	6284.91	6448.37	6780.13	7134.17	7302.91	7580.45	7657.52	7741.16	7845.25	8115.63	8379.95	8829.39	7676.98	7822.38	7942.28	8119.65	8382.05
cluster No	JWID	gene name	S / N
A1	JW5800	nadR	N		0.344566	34.6667	96.6605	99.2609		99.0954		91.3065
	JW3778	cyaA	N		1.0646	27.1153	91.1951	98.3673		97.9982
	JW0945	helD	N		2.16926	31.6798	91.1312	95.2535		96.1326		95.6683
	JW2799	mutH	N		0.506857	24.774	90.7072	97.4071		97.5128		97.9807
	Not ORF	phoU/bglG			1.55299	27.5097	92.778	99.5053		98.7765		98.7783
	JW1967	nac	S		0	26.1147	93.077	96.4667		95.6623		95.6524
	JW2712	nlpD	S		1.29291	27.4094	91.2133	99.0428		99.0297		98.8055
	JW5380	trmC	S		1.32458	33.3924	93.2332	98.5342		99.0262		98.997
A2	JW3220	mreB	S		2.95421	16.2063	55.7003	64.6584	97.4097	100		99.4576
	JW2994	qseC	N		3.59029	9.44275	59.781	67.6856	99.3256	99.3039		99.6072
	JW3370	yhgF	N		1.21671	9.67532	54.8716	64.5173	97.5859	99.7814		99.8266
	JW0552	ylcE	N		0.0919118	9.17159	54.6378	59.5872	96.5087	99.943		100
	JW0610	citC	N			7.44373	50.1855	61.6481	98.8889	98.967		99.6688
	JW0179	dnaE	N			8.54707	56.5957	67.5977	97.975	99.1646		98.921
	JW1059	flgA	N			8.14107	48.6206	57.3755	97.526	97.6388		97.7346
	JW1506	ego	N			2.11932	51.3599	65.1472	100	96.0296		97.2741
	JW4001	plsB	N			1.56779	54.1952	65.3235	97.0254	97.6886		97.3838
	JW2110	yehQ	N			1.61325	59.8996	68.6087	99.662	98.9431		98.3846
A3	JW1873	cheR	S			2.91545	0.417791	18.7391	0.894971	85.0192	99.0052	99.4152
	JW3052	fadH	N			1.9527	1.96561	20.7095	2.10647	82.8695	98.2717	99.4997
	JW5161	lolC	N			1.82525	1.61443	18.3335	0.69954	84.6496	95.7157	98.6541
	JW0507	ylbE	N			6.79707	4.53197	26.773	3.2243	84.2379	96.5348	98.3231
A4	JW2217	atoE	N			2.11098	0.587508	1.23079	1.86464	83.6389	96.0086	97.5789
	JW3778	cyaA	N			0.710847	1.32088	0.78344	0.448654	80.2731	96.953	95.6977
	JW3578	lldP	N			3.93683	3.94006	3.55731	2.18111	85.1112	93.0547	98.9709
	JW2651	nrdF	S			0	0.265957	0	0.6	90.655	99.6555	98.8566
	JW0999	putA	N			0.233645	0.432501	0.600399	1.41552	84.2304	96.7655	98.1304
	JW2149	rihB	N			4.86907	1.04039	0.538462	0.185185	82.6058	97.8251	98.1231
	JW5206	ydaM	N			2.00187	2.14291	1.22783	2.1978	86.3462	99.8496	99.8279		99.6933
	JW2096	yehB	S			1.94948	1.11952	1.36253	0.825083	83.2733	97.8452	98.0174		98.9912
	JW2850	ygfO	S			0.3125	0.38198	0.68099	0.807754	81.8392	98.4786	99.3402		97.8805
	JW3682	yidD	S			1.83049	3.97513	3.86707	0.304569	84.8758	98.3559	99.1377		99.4939
A5	JW1336	ydaN	N			1.85719	2.27838	3.35599	1.43198	37.1387	82.4773	99.2188		100
	JW0928	pyrD	N			0.569892	0.790629	1.14471	1.85483	31.897	81.0157	99.2366		98.8299
	JW1287	sapA	N			0.749465	0.209205	0.306748	0.485437	11.5811	79.7782	99.1883		99.1453
A6	JW2576	rluD	N					4.72313	4.08805	4.66321	9.71993	96.5986		95.8751
B1	JW0306	betT	S									99	55	30	79	81	3				90	98			98
	JW3512	dppB	N								3	96	52	18	70	76	3			3	86	96			96
	JW3370	yhgF	N								2	96	46	32	79	83	3			2	89	96			94
	JW3180	gltD	N								1	96	59	30	79	81	1			0	90	98			93
	JW2054	yegD	N								2	97	52	34	74	85	1			3	88	97			93
	JW3998	yjbI	S								2	95	44	24	75	77	1			2	87	96			97
R1	JW0621	ybeM	N			2.97068				6.56112		1.62127	22.615	70	18	17	97			97	9	1			1
	JW0710	gltA	N			0.515055				0		0.115031	19.4938	69	20	16	97			98	8	1			1
	JW1337	dbpA	N							3.65787		4.31412	25.0818	67	21	18	96			98	10	2			0
	JW2378	ypdB	N			0.419463				0.402685		0.0335796	21.1901	69	22	20	98			97	10	2			3
	JW2722	cysD	S			1.83255				1.30762		1.1534	23.3428	70	20	17	97			98	9	0			0
	JW3766	wzxE	N			1.42941				1.19595		1.04022	24.075	71	17	26	95			92	10	2			1
	JW5599	rffD	S			3.21046				3.34129		3.62854	30.3557	75	24	21	96			97	11	1			0
	JW3747	ilvC	S			1.27387				2.40853		3.53768	18.3623	67	14	16	97			99	7	2			1
	JW5942	bcsC	N			0.961178				1.61767		1.37748	23.3696	67	22	17	98			97	11	2			4
	JW2037	fcl	N	1								6	39	68	21	14	97			96	10	1
	notORF	paaK/paaJ		0								1	29	74	26	23	97			99	12	0
B2	JW2222	yfaS	N								1	1	9	28	78	80	1			2	86	97			94
	JW1587	ynfL	N								1	4	10	29	74	81	2			1	86	96			95
	JW1540	stfQ	N								1	5	10	34	80	81	0			1	86	97			92
	JW1276	yciT	N								1	2	8	21	80	84	1			1	87	96			98
	JW0407	thiL	S								2	2	11	30	78	78	3			4	87	98			96
	JW0478	ybbK	S									2	11	27	78	80	4				89	98			99
	JW1504	ydeV	S									1	11	25	70	76	1				92	96			88
	JW3674	yidA	N										8	20	73	77	1			0	84	98			98
	notORF	gltS/trmH									1	1	8	24	73	75	2			1	85	98			97
B3	JW3829	mobA	S										0	21	78	80	1			0	87	98			97
	JW2777	ygdE	S										0	24	75	78	1			0	82	96			89
	not ORF	ydgI/ydgH										0	0	26	70	77	0				86	97			96
	not ORF	rpmH/dnaA		2								2	1	29	73	77	2				84	93			98
	JW0014	dnaJ	N	1								1	1	32	80	82	1				90	99			99
	JW5878	csiE	N										1	31	80	81	1			1	89	98			98
B4	JW1117	purB	S									1	7	17	41	49	4				52	57	58.9159	61.7818	66
R2	notORF	msrA/ytfL													6	5	76	97	96	98
	JW3631	yicI	S												4	4	75	97	98	97
	JW3654	yidJ	N												2	3	69	98	98	97
	JW3539	xylG	N												3	7	77	98	95	99
	JW5501	ygiQ	N												3	3	70	98	96	97
	JW5468	ygfS	S												2	7	73	97	95	96
	JW2789	ptr	N												6	8	80	99	98	97
	JW2573	clpB	N												2	6	74	92	98	97
	JW2413	yfeS	N												3	5	76	98	97	98
	JW1683	aroD	N												4	7	73	98	98	98
	JW0855	poxB	N												2	3	68	97	92	93
	JW2213	atoS	N												1	5	74	98	98	97
	JW5062	ylaB	S												1	4	85	96	97	97
	JW3718	gidB	N												5	5	68	98	97	97
	JW3699	bglB	S												5	6	79	94	99	98
	not ORF	gmhB/metN													8	5	73	98	98	97
	JW4201	mgtA	N												0	3	53	95	95	95
	JW0075	leuO	S												2	3	75	84	96	97
R3	JW1329	ogt	N												3		0	55	96	97
	JW1077	fabH	N												3		2	62	96	97
	JW4290	yjiE	N												2		2	61	94	97
R4	not ORF	ydbA/ydbA													0	0	2	16	80	13
	JW0467	ybaL	N												2	2	1	22	78	15
R5	JW1492	ydeM	N													1	1	1	61	15
	JW1489	pqqL	N													6	2	2	62	12
	JW0518	folD	N													3	3	4	75	15
R6	JW0593	ybdL	N												0	1	0	3	24	86
	JW2294	pta	N												6	5	6	5	21	82
	JW2987	parC	N												4	5	6	5	12	86
	JW4102	groS	N												1	2	1	2	14	87
R7	JW1696	ydiU	S												2	4			3	81
	JW1506	ego	N												4	0			4	84
	JW5923	ygfK	S												1	3			3	85
	JW2733	cysI	N												2	0			1	83
	JW2298	yfcF	N												1	2			2	82
	JW5071	sfmH	N												2	1			2	81
	JW0599	ahpF	N												5	5			3	74
	JW3982	yjbC	N												1	1			1	86
	JW3835	polA	N												1	0			0	83
B5	JW2102	molR	N																		4	96	80	98	96
	JW5161	lolC	S																		2	95	78	99
B6	JW2318	flk	S																		2	2	10	97	90
	JW2234	glpT	S																		3	0	19	93	98
	not ORF	yodD/dsrB																			0	0	8	97	97
	JW2733	cysI	N																		2		9	97	99
B7	JW4067	phnC	N																		3	3	4	95	96
	JW1077	fabH	N																		5	3	3	98
	JW1037	mdoH	N																		2	4	2	92	98
	JW3236	yhdW	S																		2	4	4	94	95
	JW1551	ydfT	S																		2	2	2	97	97
	JW1467	yddK	N																		1	1	5	90	94
	JW1274	yciH	N																		0	0	6	96	98
B8	JW2797	ptsP	N																		2	4	3	25	82
B9	JW1861	torZ	N																		0	2	1	3	44
	not ORF	pck/yhgE																			1	3	0	3	37
	JW1709	thrS	N																		0	1	0	0	38
	JW1689	ydiS	N																		2	2	4	2	21
	JW0630	mrdA	N																		4			0	29
	JW5783	yjiH	N																		2	0	1	0	17
