# Supplementary material for: Molecular Clock of Neutral Mutations in a Fitness-Increasing Evolutionary Process
Source: PLoS Genet. 2015 Jul 15;11(7):e1005392. doi: 10.1371/journal.pgen.1005392 (PMC4503671; doi:10.1371/journal.pgen.1005392)
Supplement: S3 Table — Generation was calculated based on the increase in OD as described in Material and Method section. Cumulative generation started at generation 7580, at which the previous adaptive evolution (Kishimoto, et al. 2010) was duplicated and elongated to Line1 (left) and Line2 (right). (XLS) [file pgen.1005392.s004.xls]

## Sheet: Table S3
Time (days)	Temperature (°C)	Generation	Cumulative generation	Growth (h-1)		Time (days)	Temperature (°C)	Generation	Cumulative generation	Growth (h-1)
0	44.8	0	7580.45			0	44.8	0	7580.45
1	44.8	5.97245	7586.42	0.172491		1	44.8	6.35418	7586.8	0.183516
2	44.8	16.3339	7602.76	0.465278		2	44.8	16.0371	7602.84	0.46093
3	44.8	17.8442	7620.6	0.517156		3	44.8	18.5069	7621.35	0.53487
4	44.8	18.4371	7639.04	0.534339		4	44.8	18.6663	7640.01	0.538357
5	44.8	18.4876	7657.52	0.533943		5	44.8	18.3677	7658.38	0.531588
6	44.8	17.3754	7674.9	0.500084		6	44.8	18.5949	7676.98	0.535555
7	45	18.3219	7693.22	0.523703		7	45	19.2121	7696.19	0.536609
8	45	17.8443	7711.07	0.513582		8	45	20.2176	7716.41	0.583907
9	45.2	15.9008	7726.97	0.436499		9	45	no measurement
10	45.2	14.1942	7741.16	0.434058		10	45	26.9296	7743.34	0.392558
11	45.4	10.7027	7751.86	0.309108		11	45	17.6704	7761.01	0.504385
12	45.4	12.381	7764.25	0.358823		12	45	18.8095	7779.82	0.554404
13	45.4	13.9601	7778.21	0.401787		13	45.2	12.4729	7792.29	0.356272
14	45.4	15.0126	7793.22	0.435092		14	45.2	13.8796	7806.17	0.403097
15	45.6	11.6841	7804.9	0.336281		15	45.2	16.2071	7822.38	0.463573
16	45.6	11.9079	7816.81	0.343914		16	45.4	9.00154	7831.38	0.26161
17	45.6	14.4048	7831.21	0.420407		17	45.4	11.0272	7842.4	0.313256
18	45.6	14.0341	7845.25	0.406734		18	45.4	17.5596	7859.96	0.505737
19	45.8	10.7642	7856.01	0.310883		19	45.4	16.2849	7876.25	0.476616
20	45.8	11.1364	7867.15	0.320519		20	45.6	12.2622	7888.51	0.351945
21	45.8	11.8698	7879.02	0.344009		21	45.6	11.6848	7900.2	0.347608
22	45.8	9.99866	7889.02	0.287773		22	45.6	14.074	7914.27	0.394156
23	45.8	10.6823	7899.7	0.307448		23	45.6	13.8074	7928.08	0.406968
24	45.8	11.8281	7911.53	0.341609		24	45.6	14.2011	7942.28	0.408724
25	45.8	12.0381	7923.57	0.347675		25	45.8	9.73872	7952.02	0.277983
26	45.8	11.2389	7934.81	0.324593		26	45.8	12.026	7964.04	0.346602
27	45.8	12.1401	7946.95	0.35062		27	45.8	12.6073	7976.65	0.369242
28	45.8	10.8408	7957.79	0.310935		28	45.8	12.721	7989.37	0.369967
29	45.8	12.0768	7969.86	0.351231		29	45.8	12.7004	8002.07	0.362772
30	45.8	12.304	7982.17	0.354124		30	45.8	12.4516	8014.52	0.363146
31	45.8	12.8202	7994.99	0.370261		31	45.8	12.3663	8026.89	0.357153
32	45.8	12.6717	8007.66	0.367247		32	45.8	12.9918	8039.88	0.370839
33	45.8	12.7066	8020.37	0.365711		33	45.8	12.415	8052.3	0.35881
34	45.8	12.6981	8033.06	0.365466		34	45.8	12.7625	8065.06	0.371693
35	45.8	12.2241	8045.29	0.354275		35	45.8	12.9069	8077.97	0.376425
36	45.8	12.2638	8057.55	0.35667		36	45.8	13.8942	8091.86	0.397963
37	45.8	12.6969	8070.25	0.365432		37	45.8	13.9829	8105.84	0.405814
38	45.8	11.816	8082.06	0.341261		38	45.8	13.8027	8119.65	0.400866
39	45.8	19.9635	8102.03	0.532216		39	46	11.0465	8130.69	0.301451
40	45.8	13.6064	8115.63	0.428692		40	46	8.26478	8138.96	0.250527
41	46	11.3594	8126.99	0.329216		41	46	11.889	8150.85	0.344804
42	46	11.1112	8138.1	0.319794		42	46	11.8715	8162.72	0.340732
43	46	11.8561	8149.96	0.342416		43	46	12.1784	8174.9	0.353937
44	46	12.1985	8162.16	0.327305		44	46	12.7928	8187.69	0.365913
45	46	0.602036	8162.76	0.0188255		45	46	12.3642	8200.05	0.357836
46	46	12.2876	8175.05	0.352432		46	46	11.3596	8211.41	0.326942
47	46	12.9913	8188.04	0.379152		47	46	12.5146	8223.93	0.360934
48	46	11.5629	8199.6	0.331648		48	46	12.899	8236.83	0.377253
49	46	13.0023	8212.61	0.375521		49	46	12.9227	8249.75	0.371672
50	46	11.8639	8224.47	0.341458		50	46	12.571	8262.32	0.360808
51	46	12.6845	8237.15	0.368905		51	46	12.3042	8274.62	0.358849
52	46	11.661	8248.81	0.339138		52	46	13.3999	8288.02	0.38249
53	46	11.1459	8259.96	0.320792		53	46	12.7496	8300.77	0.373935
54	46	11.0434	8271	0.318946		54	46	12.4537	8313.23	0.354508
55	46	11.01	8282.01	0.321328		55	46	no measurement
56	46	11.5932	8293.61	0.331374		56	46	14.6666	8327.89	0.213051
57	46	11.1468	8304.75	0.320819		57	46	13.0875	8340.98	0.373058
58	46	11.441	8316.2	0.33158		58	46	12.921	8353.9	0.37763
59	46	12.8535	8329.05	0.372518		59	46	13.9753	8367.88	0.403902
60	46	12.9135	8341.96	0.361654		60	46	14.1719	8382.05	0.402042
61	46	12.5293	8354.49	0.36312
62	46	12.7845	8367.28	0.379779
63	46	12.6781	8379.95	0.36489
64	46	13.1293	8393.08	0.379189
65	46	12.6959	8405.78	0.365403
66	46	14.7341	8420.51	0.427021
67	46	13.3219	8433.84	0.387443
68	46	12.921	8446.76	0.369327
69	46	12.2408	8459	0.353528
70	46	no measurement
71	46	10.6911	8469.69	0.20973
72	46	7.74425	8477.43	0.223663
73	46	5.11399	8482.55	0.148731
74	46	12.4604	8495.01	0.35739
75	46	12.6479	8507.65	0.366559
76	46	13.15	8520.8	0.378472
77	46	13.3491	8534.15	0.386879
78	46	14.3833	8548.54	0.413969
79	46	13.2334	8561.77	0.382195
80	46	13.2943	8575.06	0.385291
81	46	13.4552	8588.52	0.387257
82	46	12.9786	8601.5	0.374837
83	46	13.1984	8614.7	0.381183
84	46	13.5889	8628.29	0.392462
85	46	12.5471	8640.83	0.364909
86	46	12.5877	8653.42	0.361041
87	46	12.9298	8666.35	0.373428
88	46	13.058	8679.41	0.379767
89	46	12.2083	8691.62	0.350157
90	46	11.8341	8703.45	0.342974
91	46	11.9875	8715.44	0.323731
92	46	10.2134	8725.65	0.337114
93	46	12.7313	8738.38	0.349492
94	46	11.585	8749.97	0.335753
95	46	12.6719	8762.64	0.362205
96	46	12.8694	8775.51	0.396462
97	46	13.0189	8788.53	0.35621
98	46	13.7556	8802.28	0.37269
99	46	13.1913	8815.48	0.40789
100	46	13.9119	8829.39	0.401793
